# Supplementary material for: Development and Validation of Liquid Chromatography-Tandem Mass Spectrometry Method for Simultaneous Determination of Tramadol and Its Phase I and II Metabolites in Human Urine
Source: MDPI journal article supplement (doi:10.3390/separations10060365), 2023-06-19
Supplement: s1 [file s1]

## Development and Validation of Liquid Chromatography-Tandem Mass Spectrometry Method for Simultaneous Determination of Tramadol and its Phase I and II Metabolites in Human Urine

| Figure No. | Figure Description                                                                                         |
|------------|------------------------------------------------------------------------------------------------------------|
| Figure S1  | MS/MS of urine extract m/z 426.3138 corresponding to $[M + H]^+$ ion of O-desmethyl TD Glucuronide (M13)   |
| Figure S2  | MS/MS of urine extract m/z 456.4048 corresponding to $[M + H]^+$ ion of OH TD Glucuronide (M16)            |
| Figure S3  | MS/MS of urine extract m/z 412.1174 corresponding to $[M + H]^+$ ion of N,O-desmethyl TD Glucuronide (M15) |
| Figure S4  | MS/MS of urine extract m/z 280.3817 corresponding to $[M + H]^+$ ion of OH TD (M6)                         |
| Figure S5  | MS/MS of urine extract m/z 252.2158 corresponding to $[M + H]^+$ ion of OH-didesmethyl TD (M8)             |
| Figure S6  | MS/MS of urine extract m/z 266.4093 corresponding to $[M + H]^+$ ion of OH-O-desmethyl TD (M32)            |
| Figure S7  | MS/MS of urine extract m/z 360.4492 corresponding to $[M + H]^+$ ion of OH - TD Sulphate (M23)             |
| Figure S8  | MS/MS of urine extract m/z 302.4325 corresponding to $[M + H]^+$ ion of N,N,O-desmethyl TD Sulphate (M21)  |
| Figure S9  | MS/MS of urine extract m/z 316.4469 corresponding to $[M + H]^+$ ion of N,O-desmethyl TD Sulphate (M22)    |

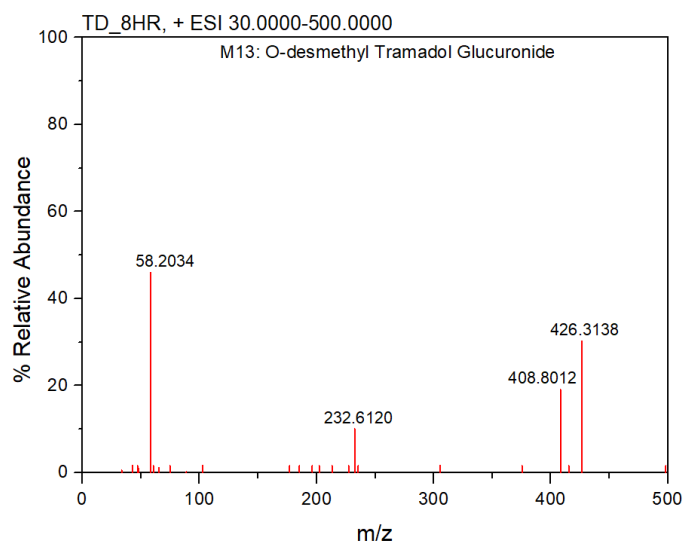

Figure S1. MS/MS of urine extract m/z 426.3138 corresponding to  $[M + H]^+$  ion of O-desmethyl TD Glucuronide (M13)

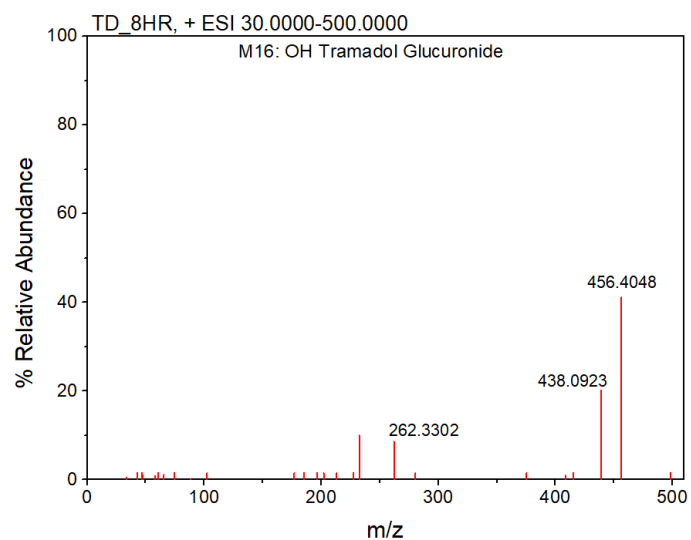

Figure S2. MS/MS of urine extract m/z 456.4048 corresponding to  $[M + H]^+$  ion of OH TD Glucuronide (M16)

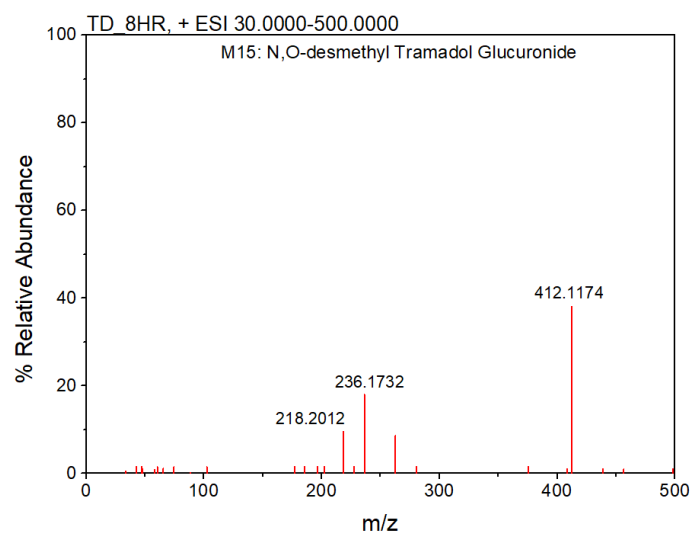

Figure S3. MS/MS of urine extract m/z 412.1174 corresponding to  $[M + H]^+$  ion of N,O-desmethyl TD Glucuronide (M15)

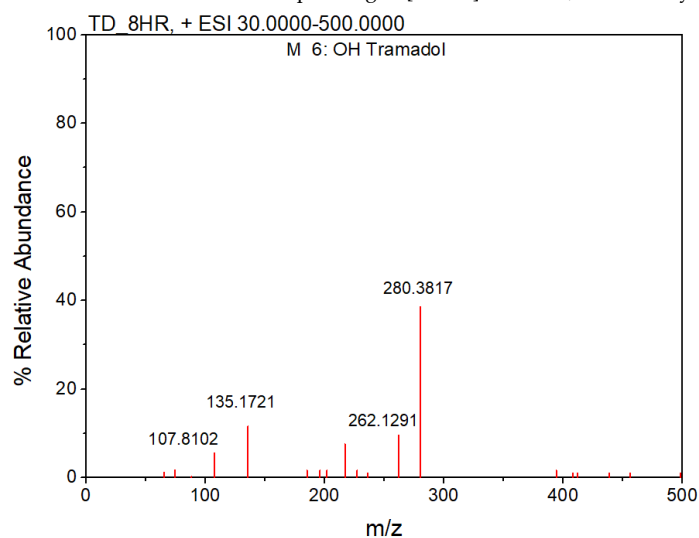

Figure S4. MS/MS of urine extract m/z 280.3817 corresponding to  $[M + H]^+$  ion of OH TD (M6)

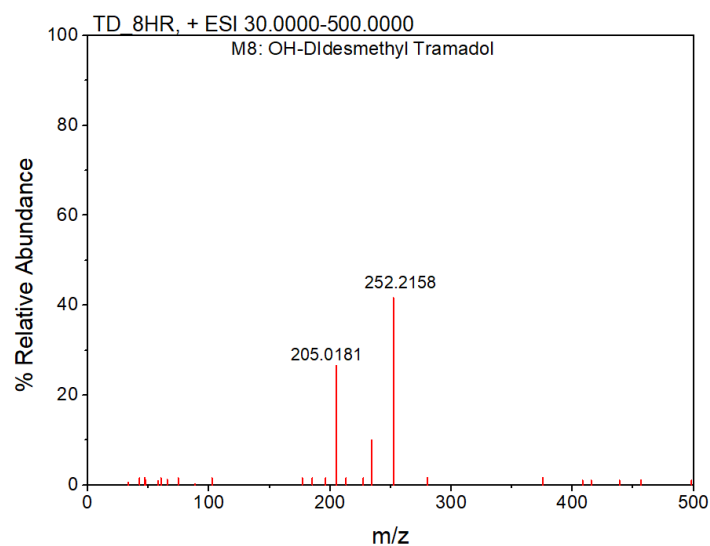

Figure S5. MS/MS of urine extract m/z 252.2158 corresponding to  $[M + H]^+$  ion of OH-didesmethyl TD (M8)

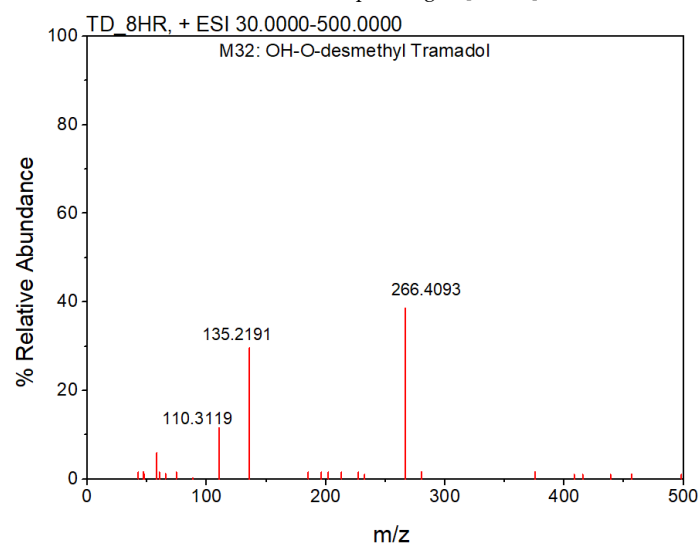

Figure S6. MS/MS of urine extract m/z 266.4093 corresponding to  $[M + H]^+$  ion of OH-O-desmethyl TD (M32)

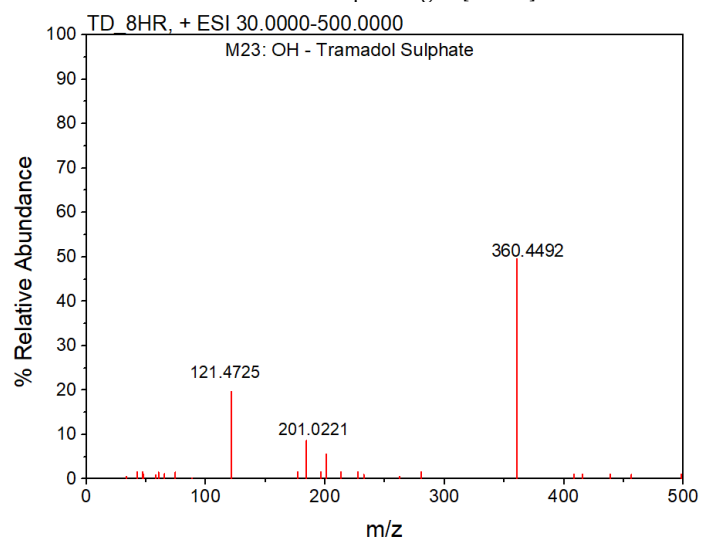

Figure S7. MS/MS of urine extract m/z 360.4492 corresponding to  $[M + H]^+$  ion of OH - TD Sulphate (M23)

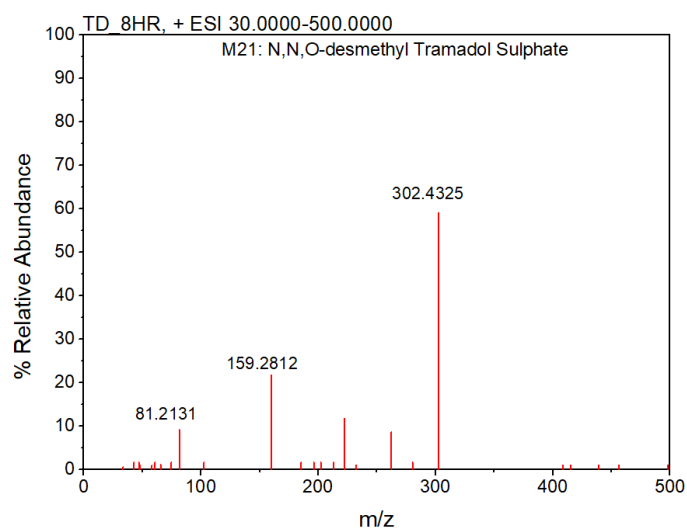

Figure S8. MS/MS of urine extract m/z 302.4325 corresponding to  $[M + H]^+$  ion of N,N,O-desmethyl TD Sulphate (M21)

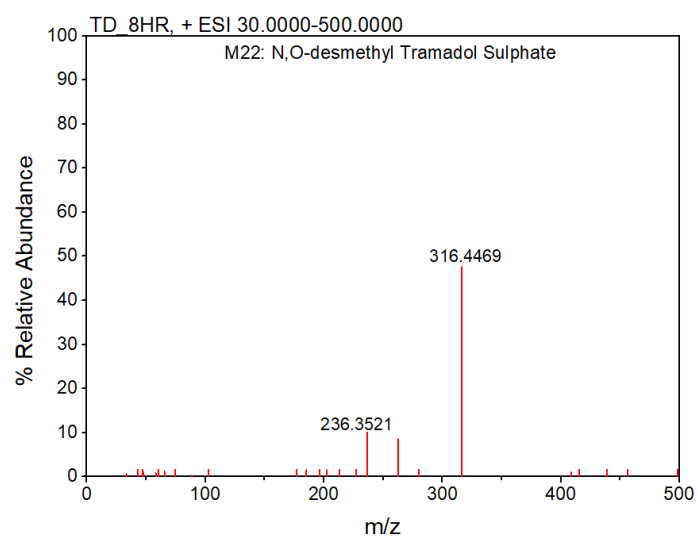

Figure S9. MS/MS of urine extract m/z 316.4469 corresponding to  $[M + H]^+$  ion of N,O-desmethyl TD Sulphate (M22)
